# Supplementary material
Source: MDPI journal article supplement (https://www.mdpi.com/2073-445X/9/11/429)
Supplement: s1 [file s1]

## Article

# Climatic Impact Toward Regional Water Allocation and Transfer Strategies from Economic, Social and Environmental Perspectives

Zhongwen Xu <sup>1</sup>, Liming Yao <sup>1</sup> and Yin Long <sup>2,\*</sup>

<sup>1</sup> Business School, Sichuan University, Chengdu 610064, China; 2017225020033@stu.scu.edu.cn (Z.X.); lmyao@scu.edu.cn (L.Y.)

<sup>2</sup> Institute for Future Initiatives, University of Tokyo, 7-3-1 Hongo, Bunkyo-ku, Tokyo 113-8654, Japan

\* Correspondence: longyin@g.ecc.u-tokyo.ac.jp

**Supplementary Materials:** The following are available online at [www.mdpi.com/2073-445X/9/11/429/s1](http://www.mdpi.com/2073-445X/9/11/429/s1).

$$W_S = \omega^E W_S^E + \omega^U W_S^U \quad (S1)$$

$$W_S^E = \frac{1}{2} \sum_{k=1}^2 \sum_{t=1}^4 \frac{\sum_{i=1}^4 W W_{ikt}}{S_{kt}} = \frac{1}{2} \sum_{k=1}^2 \sum_{t=1}^4 \frac{\sum_{i=1}^4 q_{ikt} x_{ikt}}{S_{kt}} \quad (S2)$$

$$W_S^U = \frac{1}{2} \sum_{k=1}^2 \sum_{t=1}^4 \frac{\sum_{i=1}^4 x_{ikt}}{S_{kt}} \quad (S3)$$

**Publisher's Note:** MDPI stays neutral with regard to jurisdictional claims in published maps and institutional affiliations.

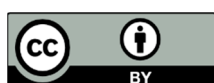

© 2020 by the authors. Licensee MDPI, Basel, Switzerland. This article is an open access article distributed under the terms and conditions of the Creative Commons Attribution (CC BY) license (<http://creativecommons.org/licenses/by/4.0/>).
